# Supplementary material for: Multi-species genetic connectivity in a terrestrial habitat network
Source: PubMed Central journal article supplement (PMC5629812; doi:10.1186/s40462-017-0112-2), 2017-10-06
Supplement: 40462_2017_112_MOESM1_ESM.pdf [file 40462_2017_112_MOESM1_ESM.pdf]

**Additional file 1.**

**Supplementary material for Marrotte et al., Multi-species genetic connectivity in a terrestrial habitat network.**

**Appendix 1. Description of cost values for different land cover elements in a study of multi-species genetic connectivity in Ontario, Canada. Cost estimates followed the methodology of Koen et al. [11].**

| Data source                                                                      | Publisher   | Land cover                               | Resistance |
|----------------------------------------------------------------------------------|-------------|------------------------------------------|------------|
| <sup>1</sup> Built-up Area                                                       | OMNRF, 2013 | Urban - (Population ≥ 1000)              | 1000       |
| <sup>2</sup> Ontario Hydro Network (OHN), 500k Waterbody                         | OMNRF, 2011 | Water Bodies (Area ≥ 100m <sup>2</sup> ) | 1000       |
| <sup>3</sup> Ontario Road Network (ORN)                                          | OMNRF, 2010 | Arterial                                 | 1000       |
| <sup>3</sup> Ontario Road Network (ORN)                                          | OMNRF, 2010 | Collector                                | 100        |
| <sup>3</sup> Ontario Road Network (ORN)                                          | OMNRF, 2010 | Expressway / Highway                     | 1000       |
| <sup>3</sup> Ontario Road Network (ORN)                                          | OMNRF, 2010 | Local / Strata                           | 100        |
| <sup>3</sup> Ontario Road Network (ORN)                                          | OMNRF, 2010 | Local / Street                           | 100        |
| <sup>3</sup> Ontario Road Network (ORN)                                          | OMNRF, 2010 | Local / Unknown                          | 100        |
| <sup>3</sup> Ontario Road Network (ORN)                                          | OMNRF, 2010 | Ramp                                     | 1000       |
| <sup>3</sup> Ontario Road Network (ORN)                                          | OMNRF, 2010 | Resource / Recreation                    | 100        |
| <sup>4</sup> Southern Ontario Land Resource Information System v.1.2 (2000-2002) | OMNRF, 2007 | Open Cliff and Talus                     | 1000       |
| <sup>4</sup> Southern Ontario Land Resource Information System v.1.2 (2000-2002) | OMNRF, 2007 | Alvar                                    | 10         |
| <sup>4</sup> Southern Ontario Land Resource Information System v.1.2 (2000-2002) | OMNRF, 2007 | Shoreline                                | 10         |
| <sup>4</sup> Southern Ontario Land Resource Information System v.1.2 (2000-2002) | OMNRF, 2007 | Open Shoreline                           | 10         |
| <sup>4</sup> Southern Ontario Land Resource Information System v.1.2 (2000-2002) | OMNRF, 2007 | Open Sand Barren and Dune                | 10         |
| <sup>4</sup> Southern Ontario Land Resource Information System v.1.2 (2000-2002) | OMNRF, 2007 | Treed Sand Barren and Dune               | 10         |
| <sup>4</sup> Southern Ontario Land Resource Information System v.1.2 (2000-2002) | OMNRF, 2007 | Open Tallgrass Prairie                   | 10         |
| <sup>4</sup> Southern Ontario Land Resource Information System v.1.2 (2000-2002) | OMNRF, 2007 | Tallgrass Savannah                       | 10         |
| <sup>4</sup> Southern Ontario Land Resource Information System v.1.2 (2000-2002) | OMNRF, 2007 | Tallgrass Woodland                       | 10         |
| <sup>4</sup> Southern Ontario Land Resource Information System v.1.2 (2000-2002) | OMNRF, 2007 | Forest                                   | 10         |
| <sup>4</sup> Southern Ontario Land Resource Information System v.1.2 (2000-2002) | OMNRF, 2007 | Coniferous Forest                        | 10         |

|                                                                                  |                           |                                 |      |
|----------------------------------------------------------------------------------|---------------------------|---------------------------------|------|
| <sup>4</sup> Southern Ontario Land Resource Information System v.1.2 (2000-2002) | OMNRF, 2007               | Mixed Forest                    | 10   |
| <sup>4</sup> Southern Ontario Land Resource Information System v.1.2 (2000-2002) | OMNRF, 2007               | Deciduous Forest                | 10   |
| <sup>4</sup> Southern Ontario Land Resource Information System v.1.2 (2000-2002) | OMNRF, 2007               | Plantations - Tree Cultivated   | 10   |
| <sup>4</sup> Southern Ontario Land Resource Information System v.1.2 (2000-2002) | OMNRF, 2007               | Hedge Rows                      | 10   |
| <sup>4</sup> Southern Ontario Land Resource Information System v.1.2 (2000-2002) | OMNRF, 2007               | Transportation                  | 1000 |
| <sup>4</sup> Southern Ontario Land Resource Information System v.1.2 (2000-2002) | OMNRF, 2007               | Extraction                      | 1000 |
| <sup>4</sup> Southern Ontario Land Resource Information System v.1.2 (2000-2002) | OMNRF, 2007               | Built-up Area Previous          | 100  |
| <sup>4</sup> Southern Ontario Land Resource Information System v.1.2 (2000-2002) | OMNRF, 2007               | Built-up Area Impervious        | 1000 |
| <sup>4</sup> Southern Ontario Land Resource Information System v.1.2 (2000-2002) | OMNRF, 2007               | Swamp                           | 10   |
| <sup>4</sup> Southern Ontario Land Resource Information System v.1.2 (2000-2002) | OMNRF, 2007               | Fen                             | 10   |
| <sup>4</sup> Southern Ontario Land Resource Information System v.1.2 (2000-2002) | OMNRF, 2007               | Bog                             | 10   |
| <sup>4</sup> Southern Ontario Land Resource Information System v.1.2 (2000-2002) | OMNRF, 2007               | Marsh                           | 10   |
| <sup>4</sup> Southern Ontario Land Resource Information System v.1.2 (2000-2002) | OMNRF, 2007               | Open Water                      | 1000 |
| <sup>5</sup> Ontario Land Cover Data Base, Second Edition (2000)                 | Spectranalysis Inc., 2004 | Water - deep clear              | 1000 |
| <sup>5</sup> Ontario Land Cover Data Base, Second Edition (2000)                 | Spectranalysis Inc., 2004 | Water - shallow / sedimented    | 1000 |
| <sup>5</sup> Ontario Land Cover Data Base, Second Edition (2000)                 | Spectranalysis Inc., 2004 | Settlement / Infrastructure     | 1000 |
| <sup>5</sup> Ontario Land Cover Data Base, Second Edition (2000)                 | Spectranalysis Inc., 2004 | Sand / Gravel / Mine Tailings   | 1000 |
| <sup>5</sup> Ontario Land Cover Data Base, Second Edition (2000)                 | Spectranalysis Inc., 2004 | Bedrock                         | 10   |
| <sup>5</sup> Ontario Land Cover Data Base, Second Edition (2000)                 | Spectranalysis Inc., 2004 | Mudflats                        | 10   |
| <sup>5</sup> Ontario Land Cover Data Base, Second Edition (2000)                 | Spectranalysis Inc., 2004 | Forest Depletion - cuts         | 10   |
| <sup>5</sup> Ontario Land Cover Data Base, Second Edition (2000)                 | Spectranalysis Inc., 2004 | Forest Depletion - burns        | 10   |
| <sup>5</sup> Ontario Land Cover Data Base, Second Edition (2000)                 | Spectranalysis Inc., 2004 | Forest - regenerating depletion | 10   |
| <sup>5</sup> Ontario Land Cover Data Base, Second Edition (2000)                 | Spectranalysis Inc., 2004 | Forest - sparse                 | 10   |
| <sup>5</sup> Ontario Land Cover Data Base, Second Edition (2000)                 | Spectranalysis Inc., 2004 | Forest - dense deciduous        | 10   |
| <sup>5</sup> Ontario Land Cover Data Base, Second Edition (2000)                 | Spectranalysis Inc., 2004 | Forest - dense mixed            | 10   |
| <sup>5</sup> Ontario Land Cover Data Base, Second Edition (2000)                 | Spectranalysis Inc., 2004 | Forest - dense coniferous       | 10   |
| <sup>5</sup> Ontario Land Cover Data Base, Second Edition (2000)                 | Spectranalysis Inc., 2004 | Marsh - intertidal              | 10   |
| <sup>5</sup> Ontario Land Cover Data Base, Second Edition (2000)                 | Spectranalysis Inc., 2004 | Marsh - supertidal              | 10   |
| <sup>5</sup> Ontario Land Cover Data Base, Second Edition (2000)                 | Spectranalysis Inc., 2004 | Marsh - inland                  | 10   |

|                                                                  |                           |                                          |      |
|------------------------------------------------------------------|---------------------------|------------------------------------------|------|
| <sup>5</sup> Ontario Land Cover Data Base, Second Edition (2000) | Spectranalysis Inc., 2004 | Swamp - deciduous                        | 10   |
| <sup>5</sup> Ontario Land Cover Data Base, Second Edition (2000) | Spectranalysis Inc., 2004 | Swamp - coniferous                       | 10   |
| <sup>5</sup> Ontario Land Cover Data Base, Second Edition (2000) | Spectranalysis Inc., 2004 | Fen - open                               | 10   |
| <sup>5</sup> Ontario Land Cover Data Base, Second Edition (2000) | Spectranalysis Inc., 2004 | Fen - treed                              | 10   |
| <sup>5</sup> Ontario Land Cover Data Base, Second Edition (2000) | Spectranalysis Inc., 2004 | Bog - Open                               | 10   |
| <sup>5</sup> Ontario Land Cover Data Base, Second Edition (2000) | Spectranalysis Inc., 2004 | Bog - treed                              | 10   |
| <sup>5</sup> Ontario Land Cover Data Base, Second Edition (2000) | Spectranalysis Inc., 2004 | Tundra Heath                             | 10   |
| <sup>5</sup> Ontario Land Cover Data Base, Second Edition (2000) | Spectranalysis Inc., 2004 | Agriculture - Pasture / abandoned fields | 100  |
| <sup>5</sup> Ontario Land Cover Data Base, Second Edition (2000) | Spectranalysis Inc., 2004 | Agriculture - cropland                   | 100  |
| <sup>6</sup> Ontario Land Cover Data Base, First Edition (1998)  | OMNRF, 1998               | Water                                    | 1000 |
| <sup>6</sup> Ontario Land Cover Data Base, First Edition (1998)  | OMNRF, 1998               | Coastal Mudflats                         | 10   |
| <sup>6</sup> Ontario Land Cover Data Base, First Edition (1998)  | OMNRF, 1998               | Intertidal Marsh                         | 10   |
| <sup>6</sup> Ontario Land Cover Data Base, First Edition (1998)  | OMNRF, 1998               | Supertidal Marsh                         | 10   |
| <sup>6</sup> Ontario Land Cover Data Base, First Edition (1998)  | OMNRF, 1998               | Freshwater Coastal Marsh / Inland Marsh  | 10   |
| <sup>6</sup> Ontario Land Cover Data Base, First Edition (1998)  | OMNRF, 1998               | Deciduous Swamp                          | 10   |
| <sup>6</sup> Ontario Land Cover Data Base, First Edition (1998)  | OMNRF, 1998               | Conifer Swamp                            | 10   |
| <sup>6</sup> Ontario Land Cover Data Base, First Edition (1998)  | OMNRF, 1998               | Open Fen                                 | 10   |
| <sup>6</sup> Ontario Land Cover Data Base, First Edition (1998)  | OMNRF, 1998               | Treed Fen                                | 10   |
| <sup>6</sup> Ontario Land Cover Data Base, First Edition (1998)  | OMNRF, 1998               | Open Bog                                 | 10   |
| <sup>6</sup> Ontario Land Cover Data Base, First Edition (1998)  | OMNRF, 1998               | Treed Bog                                | 10   |
| <sup>6</sup> Ontario Land Cover Data Base, First Edition (1998)  | OMNRF, 1998               | Tundra Heath                             | 10   |
| <sup>6</sup> Ontario Land Cover Data Base, First Edition (1998)  | OMNRF, 1998               | Dense Deciduous Forest                   | 10   |
| <sup>6</sup> Ontario Land Cover Data Base, First Edition (1998)  | OMNRF, 1998               | Dense Coniferous Forest                  | 10   |
| <sup>6</sup> Ontario Land Cover Data Base, First Edition (1998)  | OMNRF, 1998               | Coniferous Plantation                    | 10   |
| <sup>6</sup> Ontario Land Cover Data Base, First Edition (1998)  | OMNRF, 1998               | Mixed Forest – mainly Deciduous          | 10   |
| <sup>6</sup> Ontario Land Cover Data Base, First Edition (1998)  | OMNRF, 1998               | Mixed Forest – mainly Coniferous         | 10   |
| <sup>6</sup> Ontario Land Cover Data Base, First Edition (1998)  | OMNRF, 1998               | Sparse Coniferous Forest                 | 10   |
| <sup>6</sup> Ontario Land Cover Data Base, First Edition (1998)  | OMNRF, 1998               | Sparse Deciduous Forest                  | 10   |
| <sup>6</sup> Ontario Land Cover Data Base, First Edition (1998)  | OMNRF, 1998               | Recent Cutovers (now >10yrs of age)      | 10   |

|                                                                 |             |                                    |      |
|-----------------------------------------------------------------|-------------|------------------------------------|------|
| <sup>6</sup> Ontario Land Cover Data Base, First Edition (1998) | OMNRF, 1998 | Old Cuts and Burns (>10yrs of age) | 10   |
| <sup>6</sup> Ontario Land Cover Data Base, First Edition (1998) | OMNRF, 1998 | Bedrock Outcrop                    | 10   |
| <sup>6</sup> Ontario Land Cover Data Base, First Edition (1998) | OMNRF, 1998 | Settlement and Developed Land      | 1000 |
| <sup>6</sup> Ontario Land Cover Data Base, First Edition (1998) | OMNRF, 1998 | Pasture and Abandoned Fields       | 100  |
| <sup>6</sup> Ontario Land Cover Data Base, First Edition (1998) | OMNRF, 1998 | Cropland                           | 100  |
| <sup>6</sup> Ontario Land Cover Data Base, First Edition (1998) | OMNRF, 1998 | Alvar                              | 10   |

\*Superscript numbers represent cost surface development overlay priority. Priority 3 land cover data was only included in small undifferentiated areas.



|                       |        |        |        |       |        |        |       |        |        |        |        |        |        |       |       |       |       |       |
|-----------------------|--------|--------|--------|-------|--------|--------|-------|--------|--------|--------|--------|--------|--------|-------|-------|-------|-------|-------|
| STD Cost (120 km)     | -0.002 | -0.002 | -0.289 | 0.082 | -0.304 | -0.125 | 0.266 | -0.321 | 0.339  | 0.584  | 0.963  | -0.034 | -0.025 | 0.025 | 0.060 | 0.113 | 0.366 | 0.616 |
| STD Cost (20 km)      | 0.099  | 0.143  | -0.309 | 0.071 | -0.208 | -0.092 | 0.192 | -0.204 | 0.563  | 0.956  | 0.546  | -0.195 | -0.248 | 0.296 | 0.444 | 0.096 | 0.614 |       |
| STD Cost (6 km)       | 0.108  | 0.194  | -0.369 | 0.146 | -0.283 | -0.100 | 0.279 | -0.270 | 0.807  | 0.566  | 0.343  | -0.315 | -0.049 | 0.592 | 0.293 | 0.050 |       |       |
| STD Current (120 km)  | -0.038 | -0.116 | 0.040  | 0.106 | -0.125 | -0.043 | 0.155 | -0.089 | 0.007  | 0.101  | 0.109  | 0.322  | 0.518  | 0.365 | 0.604 |       |       |       |
| STD Current (20 km)   | -0.047 | 0.031  | -0.097 | 0.097 | -0.115 | -0.043 | 0.173 | -0.110 | 0.210  | 0.435  | 0.040  | 0.364  | 0.421  | 0.700 |       |       |       |       |
| STD Current (6 km)    | -0.098 | 0.113  | -0.189 | 0.115 | -0.198 | -0.086 | 0.235 | -0.170 | 0.316  | 0.262  | 0.020  | 0.270  | 0.333  |       |       |       |       |       |
| Mean Current (120 km) | -0.015 | -0.021 | -0.180 | 0.327 | -0.123 | 0.119  | 0.342 | -0.274 | 0.042  | -0.005 | -0.026 | 0.453  | 0.686  |       |       |       |       |       |
| Mean Current (20 km)  | -0.065 | -0.007 | -0.121 | 0.280 | -0.101 | 0.112  | 0.321 | -0.275 | -0.122 | -0.263 | -0.012 | 0.772  |        |       |       |       |       |       |
| Mean Current (6 km)   | -0.136 | -0.001 | -0.057 | 0.163 | 0.034  | 0.130  | 0.166 | -0.137 | -0.429 | -0.224 | -0.040 |        |        |       |       |       |       |       |
| Mean Cost (120 km)    | 0.003  | 0.037  | -0.344 | 0.118 | -0.352 | -0.134 | 0.330 | -0.383 | 0.368  | 0.560  |        |        |        |       |       |       |       |       |
| Mean Cost (20 km)     | 0.105  | 0.178  | -0.358 | 0.064 | -0.240 | -0.124 | 0.220 | -0.228 | 0.627  |        |        |        |        |       |       |       |       |       |

**Appendix 3. Description of data from each location sampled for four different species in a multi-species genetic connectivity study in Ontario, Canada.**

| Species | Node ID | X       | Y        | Sample Size | Avg Edge Wt | Avg Inv Edge Wt | Mean Cost  |              |               | Mean Current Density |              |               |
|---------|---------|---------|----------|-------------|-------------|-----------------|------------|--------------|---------------|----------------------|--------------|---------------|
|         |         |         |          |             |             |                 | 6km Buffer | 20 km Buffer | 120 km Buffer | 6 km Buffer          | 20 km Buffer | 120 km Buffer |
| Fisher  | F1      | 1739622 | 12011268 | 20          | 10.130      | 0.100           | NA         | NA           | NA            | NA                   | NA           | NA            |
|         | F2      | 1445630 | 12133088 | 20          | 4.138       | 0.245           | 122.4      | 163.8        | 155.9         | 1.579                | 0.317        | 0.255         |
|         | F3      | 1533340 | 12050250 | 15          | 7.189       | 0.141           | 55.9       | 126.1        | 133.6         | 0.789                | 0.405        | 0.046         |
|         | F4      | 1419389 | 12051416 | 24          | 4.238       | 0.243           | 264.3      | 175.7        | 210.8         | 0.075                | 0.222        | -0.013        |
|         | F5      | 1467476 | 12046021 | 23          | 4.505       | 0.227           | 137.8      | 151.6        | 168.2         | 0.573                | 0.156        | 0.032         |
|         | F6      | 1303506 | 12213490 | 20          | 4.459       | 0.231           | 114.2      | 111.7        | 215.9         | -0.187               | -0.335       | -0.127        |
|         | F7      | 1497090 | 12013919 | 6           | 8.987       | 0.114           | 386.2      | 155.9        | 157.8         | -0.344               | -0.118       | -0.060        |
|         | F8      | 1286463 | 12156737 | 26          | 5.746       | 0.180           | 17.3       | 83.3         | 175.5         | 0.279                | 0.219        | 0.095         |
|         | F9      | 1561398 | 12105898 | 16          | 4.965       | 0.202           | 142.7      | 163.1        | 145.0         | -0.105               | -0.317       | -0.197        |
|         | F10     | 1313131 | 12133971 | 15          | 4.210       | 0.239           | 378.8      | 262.1        | 172.7         | -0.574               | -0.020       | 0.045         |
|         | F11     | 1309879 | 12106002 | 6           | 6.477       | 0.169           | 176.4      | 213.4        | 195.7         | 0.088                | -0.203       | 0.055         |
|         | F12     | 1500689 | 12102156 | 19          | 5.007       | 0.204           | 65.1       | 125.3        | 138.5         | -0.108               | -0.197       | 0.021         |
|         | F13     | 1332743 | 12072990 | 14          | 8.687       | 0.118           | 277.1      | 285.8        | 223.2         | 0.191                | 0.363        | -0.024        |
|         | F14     | 1595910 | 12080118 | 18          | 4.689       | 0.216           | 138.0      | 115.6        | 172.6         | -0.371               | -0.224       | -0.091        |
|         | F15     | 1594663 | 12102987 | 19          | 4.967       | 0.207           | 58.3       | 116.4        | 164.1         | 0.380                | -0.021       | -0.189        |
|         | F16     | 1214171 | 12059184 | 25          | 8.096       | 0.127           | 183.2      | 81.5         | 115.3         | 0.991                | 1.697        | 1.276         |
|         | F17     | 1650798 | 12033546 | 19          | 5.914       | 0.183           | 91.2       | 205.3        | 204.5         | 0.211                | 0.017        | 0.066         |
|         | F18     | 1296197 | 12181004 | 19          | 4.095       | 0.249           | 143.8      | 168.3        | 185.5         | -0.445               | -0.096       | 0.005         |
|         | F19     | 1513164 | 12149559 | 19          | 6.098       | 0.173           | 116.3      | 181.0        | 129.8         | 0.014                | -0.194       | -0.124        |
|         | F20     | 1442571 | 12035753 | 20          | 4.112       | 0.247           | 131.2      | 99.5         | 180.2         | 0.222                | 0.303        | -0.002        |
|         | F21     | 1634857 | 12158264 | 18          | 6.361       | 0.168           | NA         | NA           | NA            | NA                   | NA           | NA            |
|         | F22     | 1540424 | 12011498 | 13          | 7.223       | 0.143           | 148.0      | 113.8        | 140.0         | -0.331               | -0.169       | -0.052        |
|         | F23     | 1563908 | 12044767 | 23          | 5.343       | 0.193           | 301.4      | 121.6        | 157.0         | -0.187               | 0.351        | -0.020        |
|         | F24     | 1597829 | 12028458 | 29          | 5.215       | 0.196           | 351.1      | 299.7        | 189.6         | 0.027                | 0.035        | -0.066        |
|         | F25     | 1528965 | 12104651 | 17          | 5.876       | 0.176           | 66.2       | 91.0         | 141.6         | -0.157               | -0.155       | -0.098        |
|         | F26     | 1506108 | 12028673 | 26          | 5.977       | 0.171           | 93.5       | 62.8         | 147.3         | 0.408                | 0.357        | -0.020        |

|             |     |         |          |    |       |       |       |       |       |        |        |        |
|-------------|-----|---------|----------|----|-------|-------|-------|-------|-------|--------|--------|--------|
|             | F27 | 1593416 | 12127105 | 22 | 4.689 | 0.215 | 160.0 | 169.1 | 154.6 | -0.472 | -0.568 | -0.288 |
|             | F28 | 1641234 | 12081781 | 18 | 4.535 | 0.223 | 70.4  | 90.9  | 186.4 | 0.585  | 0.377  | -0.063 |
|             | F29 | 1348173 | 12111161 | 22 | 4.755 | 0.219 | 76.9  | 114.5 | 200.8 | 0.276  | 0.197  | -0.024 |
|             | F30 | 1378827 | 12220481 | 14 | 6.896 | 0.152 | 79.2  | 72.9  | 182.3 | 1.139  | 1.156  | 0.169  |
|             | F31 | 1376598 | 12024262 | 15 | 4.594 | 0.219 | 809.9 | 342.1 | 251.2 | -1.080 | -0.315 | -0.027 |
|             | F32 | 1673840 | 12066493 | 44 | 6.141 | 0.177 | 99.3  | 99.0  | 170.1 | 0.548  | 0.511  | 0.101  |
|             | F33 | 1623354 | 12110888 | 20 | 4.301 | 0.233 | 129.0 | 139.2 | 179.0 | -0.214 | -0.297 | -0.147 |
|             | F34 | 1568051 | 12147895 | 18 | 4.997 | 0.201 | 119.8 | 152.6 | 146.5 | -0.592 | -0.396 | -0.344 |
| Canada lynx | L1  | 1080606 | 12230197 | 18 | 4.290 | 0.233 | 194.8 | 156.6 | 156.5 | -0.032 | -0.088 | -0.121 |
|             | L2  | 1270773 | 12562168 | 23 | 4.197 | 0.243 | 242.7 | 159.6 | 76.5  | -1.124 | -0.648 | -0.238 |
|             | L3  | 1186138 | 12560719 | 27 | 3.431 | 0.294 | 42.9  | 86.5  | 71.2  | 0.519  | 0.352  | -0.087 |
|             | L4  | 1087993 | 12410014 | 23 | 3.555 | 0.283 | 81.2  | 86.5  | 92.2  | -0.145 | -0.282 | -0.164 |
|             | L5  | 1083299 | 12328081 | 22 | 3.872 | 0.264 | 79.9  | 98.8  | 120.2 | -0.104 | -0.021 | -0.044 |
|             | L6  | 353239  | 12613973 | 24 | 4.598 | 0.224 | 48.1  | 87.1  | 241.4 | 0.108  | 0.045  | 0.109  |
|             | L7  | 825677  | 12610039 | 35 | 3.723 | 0.272 | 98.4  | 110.6 | 127.9 | 0.134  | 0.257  | 0.028  |
|             | L8  | 1190125 | 12331202 | 15 | 4.448 | 0.231 | 37.6  | 94.4  | 135.7 | 0.884  | 0.638  | 0.076  |
|             | L9  | 985797  | 12603072 | 25 | 3.843 | 0.261 | 16.5  | 38.6  | 45.9  | 0.132  | 0.068  | 0.055  |
|             | L10 | 983215  | 12507143 | 27 | 3.594 | 0.279 | 34.1  | 31.8  | 87.4  | 0.562  | 0.648  | -0.078 |
|             | L11 | 481908  | 12581819 | 35 | 3.847 | 0.265 | 68.0  | 129.8 | 216.8 | 0.141  | 0.161  | -0.015 |
|             | L12 | 1122231 | 12583756 | 20 | 3.629 | 0.276 | 73.9  | 61.7  | 57.7  | 0.098  | 0.256  | 0.082  |
|             | L13 | 1071151 | 12583920 | 26 | 3.839 | 0.268 | 50.7  | 28.4  | 49.7  | 0.048  | 0.107  | 0.124  |
|             | L14 | 1141818 | 12493607 | 32 | 3.115 | 0.323 | 14.3  | 33.1  | 47.3  | -0.448 | -0.371 | 0.069  |
|             | L15 | 1086098 | 12483816 | 22 | 4.053 | 0.251 | 36.2  | 32.5  | 46.8  | -0.074 | -0.159 | -0.064 |
|             | L16 | 1285989 | 12421624 | 34 | 4.021 | 0.253 | 17.0  | 58.6  | 129.1 | 0.467  | 0.399  | -0.122 |
|             | L17 | 1277264 | 12358912 | 29 | 3.970 | 0.253 | 150.8 | 88.1  | 119.2 | -0.477 | -0.305 | -0.179 |
|             | L18 | 1345953 | 12211220 | 26 | 4.031 | 0.249 | 43.0  | 278.3 | 190.4 | -0.401 | -0.663 | -0.002 |
|             | L19 | 717517  | 12610416 | 13 | 4.347 | 0.235 | 62.4  | 50.5  | 325.9 | 0.213  | 0.185  | -0.326 |
|             | L20 | 320617  | 12775926 | 22 | 5.345 | 0.188 | 64.9  | 175.9 | 197.1 | -0.240 | -0.005 | -0.002 |
|             | L21 | 472510  | 12677654 | 13 | 5.512 | 0.182 | 72.1  | 126.1 | 192.1 | 0.282  | 0.025  | 0.078  |
|             | L22 | 1003818 | 12251441 | 18 | 3.808 | 0.264 | 36.5  | 43.1  | 107.8 | 0.816  | 0.684  | 0.249  |
|             | L23 | 1226981 | 12238141 | 27 | 3.771 | 0.272 | 32.1  | 78.5  | 160.4 | -0.377 | -0.425 | 0.000  |
|             | L24 | 567015  | 12537094 | 30 | 3.716 | 0.270 | 171.6 | 185.0 | 161.7 | 0.143  | 0.052  | 0.051  |



|        |     |         |          |    |       |       |       |       |       |        |        |        |
|--------|-----|---------|----------|----|-------|-------|-------|-------|-------|--------|--------|--------|
|        | L25 | 578319  | 12445973 | 15 | 4.464 | 0.228 | 57.6  | 59.8  | 149.2 | 0.686  | 0.671  | 0.082  |
|        | L26 | 1196149 | 12426963 | 39 | 3.539 | 0.288 | 36.7  | 149.1 | 93.4  | 0.874  | 0.407  | 0.247  |
|        | L27 | 833475  | 12500732 | 27 | 3.384 | 0.297 | 268.2 | 47.2  | 102.7 | -0.687 | -0.240 | -0.138 |
|        | L28 | 942374  | 12402154 | 35 | 3.282 | 0.305 | 201.5 | 144.4 | 136.8 | -0.317 | -0.163 | 0.058  |
| Marten | M1  | 645709  | 12504228 | 27 | 3.325 | 0.302 | 88.7  | 135.1 | 177.3 | 0.465  | 0.412  | 0.164  |
|        | M2  | 307903  | 12765030 | 47 | 2.814 | 0.356 | 112.4 | 194.2 | 211.7 | -0.138 | -0.221 | -0.018 |
|        | M3  | 331965  | 12746408 | 22 | 2.942 | 0.343 | 283.3 | 166.1 | 203.1 | -0.061 | 0.044  | 0.000  |
|        | M4  | 1310577 | 12336637 | 23 | 3.579 | 0.287 | 22.4  | 93.9  | 147.1 | 0.276  | 0.053  | -0.207 |
|        | M5  | 1314998 | 12299047 | 23 | 4.480 | 0.225 | 130.8 | 208.7 | 189.4 | -0.427 | -0.350 | -0.074 |
|        | M6  | 772061  | 12564261 | 19 | 3.357 | 0.305 | 78.4  | 156.5 | 155.1 | -0.033 | 0.099  | -0.057 |
|        | M7  | 799255  | 12559363 | 20 | 3.068 | 0.330 | 28.3  | 282.4 | 149.8 | 1.123  | -0.190 | -0.073 |
|        | M8  | 790744  | 12472796 | 23 | 3.430 | 0.298 | 277.9 | 134.6 | 107.5 | -0.472 | 0.127  | -0.016 |
|        | M9  | 870372  | 12479829 | 22 | 3.499 | 0.287 | 18.2  | 77.4  | 103.3 | -0.312 | -0.305 | -0.153 |
|        | M10 | 834988  | 12507045 | 22 | 3.559 | 0.281 | 27.5  | 79.3  | 104.7 | -0.232 | -0.405 | -0.133 |
|        | M11 | 911795  | 12523140 | 23 | 3.175 | 0.318 | 52.4  | 69.2  | 92.8  | 0.191  | -0.038 | -0.192 |
|        | M12 | 930971  | 12563164 | 24 | 3.062 | 0.328 | 13.5  | 24.9  | 62.9  | 0.116  | 0.043  | -0.055 |
|        | M13 | 995659  | 12504126 | 22 | 3.608 | 0.279 | 40.8  | 72.3  | 80.9  | 0.630  | 0.324  | -0.091 |
|        | M14 | 1093430 | 12298965 | 23 | 3.935 | 0.261 | 122.5 | 118.2 | 136.4 | -0.276 | -0.137 | -0.053 |
|        | M15 | 1087158 | 12306606 | 22 | 3.775 | 0.272 | 107.5 | 143.9 | 131.9 | -0.162 | -0.144 | -0.045 |
|        | M16 | 1243724 | 12497029 | 25 | 3.509 | 0.303 | 24.6  | 45.3  | 100.0 | 0.286  | 0.155  | -0.038 |
|        | M17 | 1254122 | 12480710 | 21 | 3.514 | 0.289 | 82.4  | 94.2  | 115.5 | -0.351 | -0.195 | -0.057 |
|        | M18 | 1195369 | 12520878 | 27 | 3.400 | 0.300 | 54.8  | 77.6  | 64.7  | 1.018  | 0.567  | 0.049  |
|        | M19 | 1288274 | 12348563 | 16 | 3.745 | 0.271 | 276.8 | 86.2  | 129.8 | -0.403 | -0.090 | -0.202 |
|        | M20 | 1330473 | 12368285 | 15 | 4.889 | 0.209 | 31.8  | 76.7  | 119.6 | 0.180  | 0.030  | -0.244 |
|        | M21 | 781645  | 12493991 | 25 | 3.533 | 0.285 | 133.6 | 110.6 | 125.9 | 0.524  | 0.359  | -0.047 |
|        | M22 | 1032093 | 12342170 | 16 | 4.237 | 0.238 | 45.1  | 104.6 | 116.5 | 0.704  | 0.106  | -0.016 |
|        | M23 | 1018022 | 12480744 | 21 | 3.323 | 0.309 | 111.4 | 63.4  | 77.9  | -0.376 | -0.311 | -0.088 |
|        | M24 | 768944  | 12541960 | 22 | 3.422 | 0.311 | 125.9 | 230.7 | 149.7 | -0.716 | -0.350 | -0.065 |
|        | M25 | 913677  | 12537056 | 24 | 3.615 | 0.281 | 51.0  | 72.2  | 85.4  | -0.023 | -0.067 | -0.167 |
|        | M26 | 1307631 | 12314745 | 26 | 3.904 | 0.259 | 88.8  | 211.0 | 175.6 | -0.033 | -0.128 | -0.164 |
|        | M27 | 1169197 | 12362830 | 11 | 4.602 | 0.220 | 144.5 | 112.5 | 124.3 | 0.015  | 0.209  | 0.078  |
|        | M28 | 1222471 | 12478785 | 19 | 3.401 | 0.297 | 41.2  | 62.4  | 84.2  | 0.189  | 0.165  | 0.112  |

|                 |     |         |          |     |       |       |       |       |       |        |        |        |
|-----------------|-----|---------|----------|-----|-------|-------|-------|-------|-------|--------|--------|--------|
|                 | M29 | 1436604 | 12125411 | 23  | 5.276 | 0.191 | 112.9 | 168.8 | 170.6 | 0.373  | 0.441  | 0.207  |
| Flying Squirrel | S1  | 1428556 | 12124870 | 22  | 4.976 | 0.208 | 312.9 | 211.6 | 173.3 | -0.023 | 0.235  | 0.194  |
|                 | S2  | 1406621 | 12173163 | 6   | 6.037 | 0.169 | 257.9 | 170.9 | 146.8 | -0.194 | 0.182  | 0.329  |
|                 | S3  | 1413325 | 12081272 | 33  | 5.242 | 0.204 | 274.8 | 229.9 | 184.8 | 0.528  | 0.210  | 0.075  |
|                 | S4  | 1458022 | 12030443 | 60  | 5.458 | 0.192 | 246.8 | 173.5 | 181.9 | 0.180  | 0.121  | -0.047 |
|                 | S5  | 1396129 | 12216839 | 11  | 5.252 | 0.200 | 81.4  | 102.1 | 162.0 | 0.836  | 0.713  | 0.326  |
|                 | S6  | 1446435 | 12017165 | 120 | 4.140 | 0.246 | 525.4 | 243.7 | 188.5 | -0.818 | -0.193 | -0.034 |
|                 | S7  | 1208537 | 11773102 | 11  | 7.320 | 0.137 | 146.3 | 134.3 | 163.7 | 0.849  | 0.701  | 0.327  |
|                 | S8  | 1413325 | 12081272 | 15  | 4.914 | 0.215 | 274.8 | 229.9 | 184.8 | 0.528  | 0.210  | 0.075  |
